# Supplementary material for: Genome-wide analysis of signal peptide functionality in Lactobacillus plantarum WCFS1
Source: PubMed Central journal article supplement (PMC2748100; doi:10.1186/1471-2164-10-425), 2009-09-10
Supplement: 1471-2164-10-425-S1.pdf [file 1471-2164-10-425-S1.pdf]

<sup>a</sup> The N-domain is defined as the N-terminal part of the SP, ending at the last positively charged residue. Histidine was defined as positive.

<sup>b</sup> The maximum hydrophobicity of the SPs was estimated using the ProtScale program (Gasteiger et al., 2005) at the ExPASy Server (<http://www.expasy.ch/tools/protscale.html>). The window size was set to 7 residues (default setup).

<sup>c</sup> Motifs found in the Secretome database entry for *L. plantarum* WCFS1 (see [www.cmbi.ru.nl/secretome](http://www.cmbi.ru.nl/secretome) and Ref. 18). Proteins for which no anchoring motif is indicated are predicted to be secreted. Lp\_1524 is not included in the Secretome database, meaning that the only localization prediction for this protein comes from LocateP.

<sup>d</sup> Signal Peptide cleavage site and subcellular localization prediction found in the LocateP database (<http://www.cmbi.ru.nl/locatep-db/cgi-bin/locatepdb.py>); see Zhou et al., 2008 (Ref. 54) for details. LocateP does not provide predicted N-terminal cleavage sites for proteins that are anchored via the sortase pathway and the LPXTG motif (hence "not specified"). "N-term" indicates proteins that possibly are N-terminally anchored through their (non-cleaved) signal peptides. "Membrane" indicates proteins annotated by LocateP as "Multi-transmembrane". Note that LocateP predictions are fully automatic and expected to be less accurate than the predictions in the Secretome database; see text for details.
