# Supplementary material for: Genome-wide analysis of signal peptide functionality in Lactobacillus plantarum WCFS1
Source: PubMed Central journal article supplement (PMC2748100; doi:10.1186/1471-2164-10-425), 2009-09-10
Supplement: 1471-2164-10-425-S2.pdf [file 1471-2164-10-425-S2.pdf]

A

SP 1-78

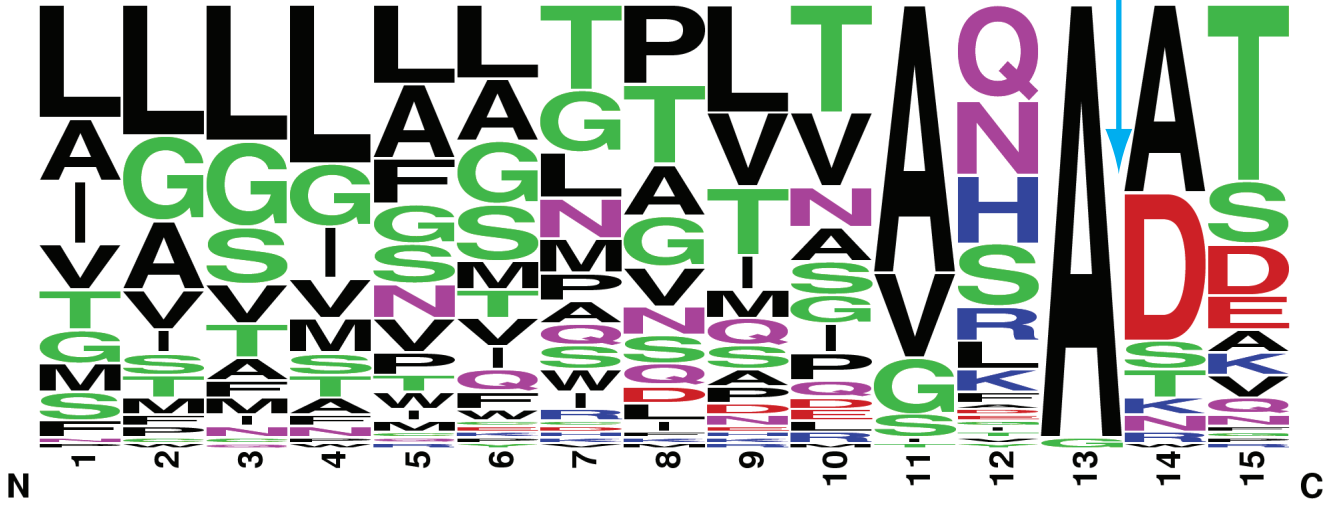

weblogo.berkeley.edu

B

SP 1-39

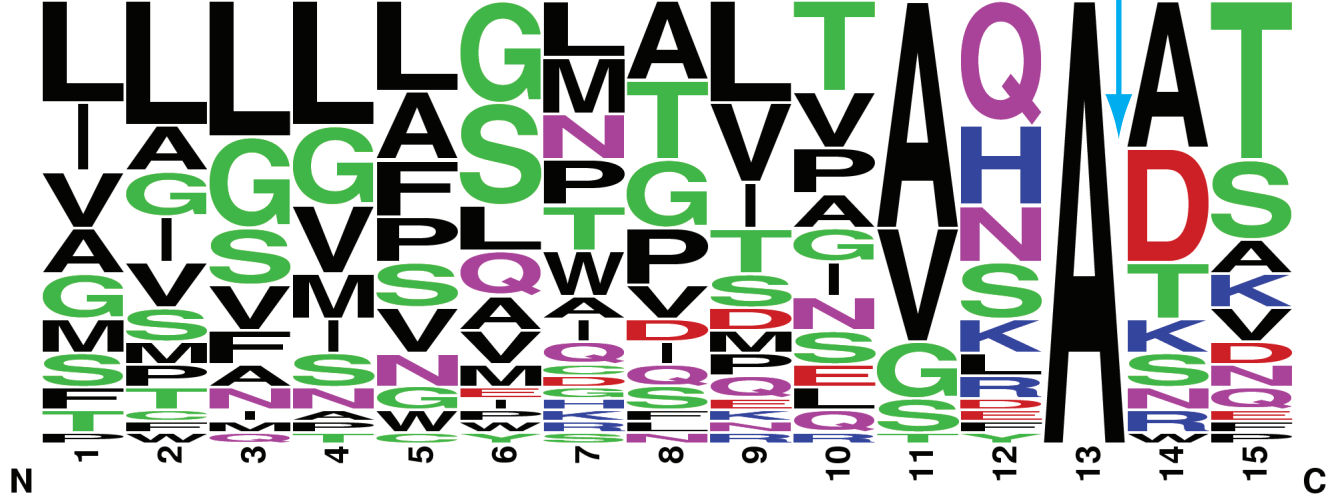

weblogo.berkeley.edu

C

SP 40-78

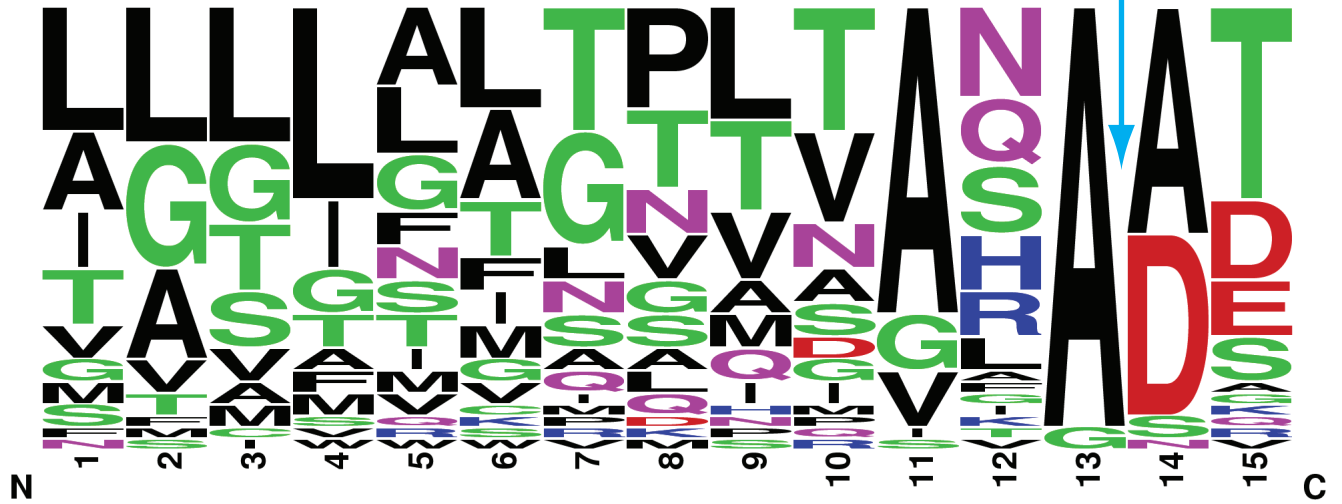

weblogo.berkeley.edu

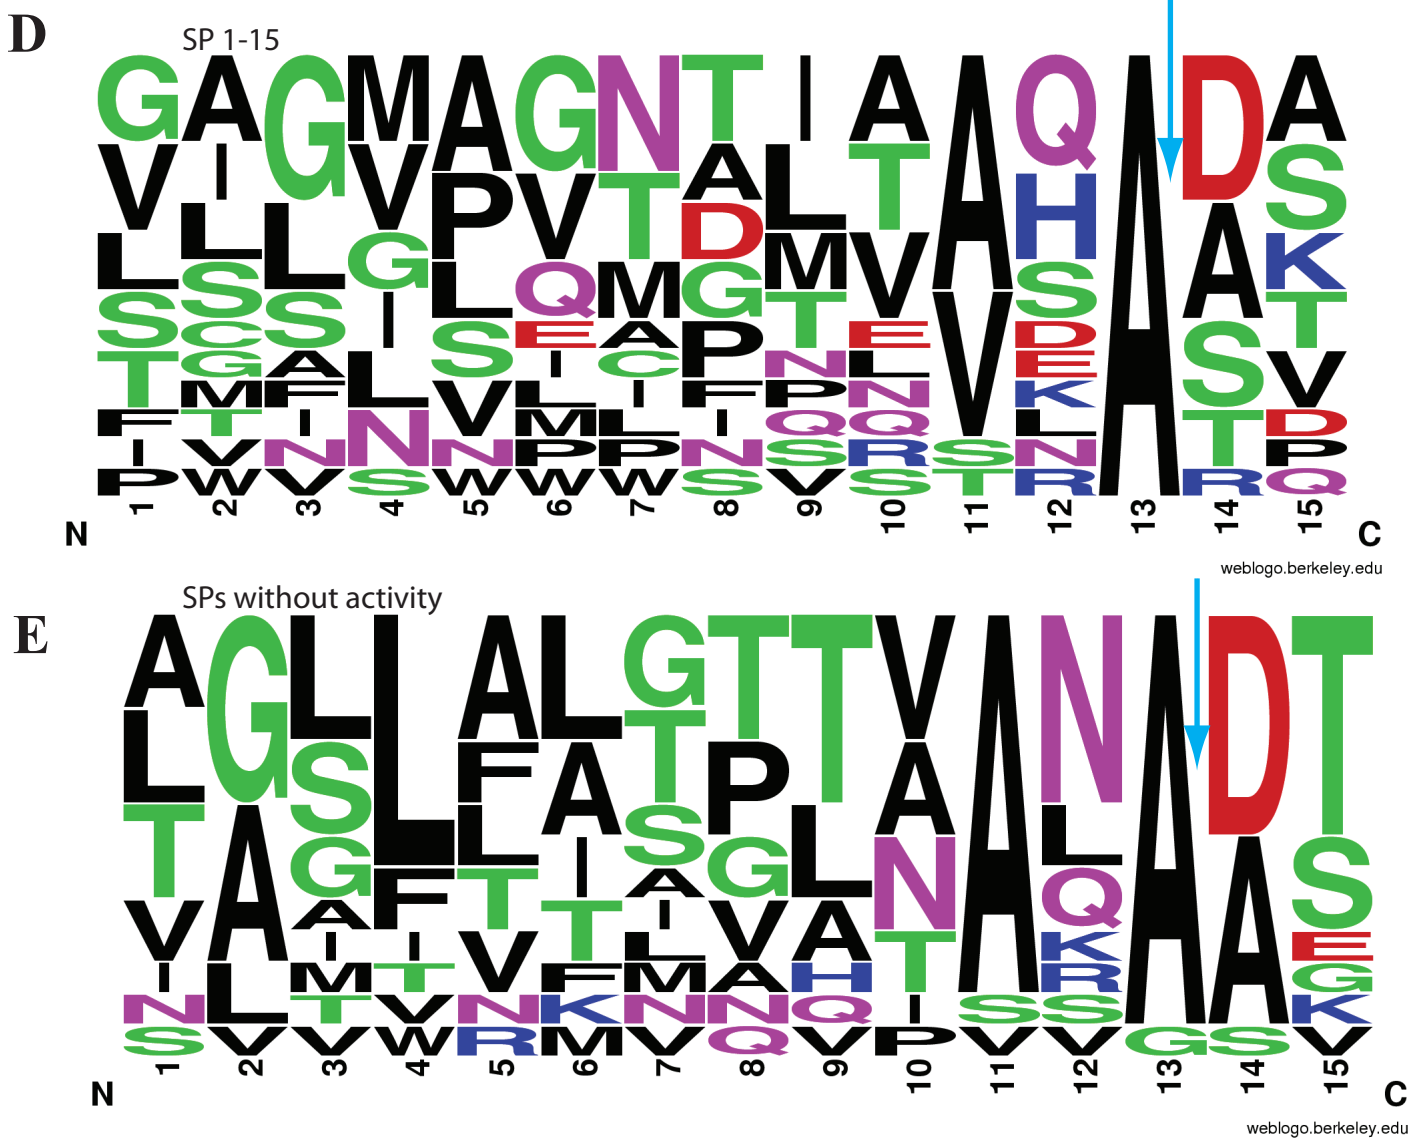

Figure S1. Frequency plot using WebLogo (Crooks et al., 2004), based on multiple alignment of 13 residues upstream of the predicated cleavage site and two residues downstream. Subgrouping of SPs is based on their performance with the NucA reporter protein. A, composition map of all SPs in the study; B, composition map of the 39 best performing SPs; C, the 39 least performing SPs; D, the 15 best performing SPs; E, the 14 SPs that resulted in no significant extracellular NucA activity. The blue arrow indicates the predicated cleavage site.
