# Supplementary material for: Genome-wide analysis of signal peptide functionality in Lactobacillus plantarum WCFS1
Source: PubMed Central journal article supplement (PMC2748100; doi:10.1186/1471-2164-10-425), 2009-09-10
Supplement: 1471-2164-10-425-S4.pdf [file 1471-2164-10-425-S4.pdf]

**Table S2.** Primers used in RT-PCR experiments and for PCR-amplification of signal peptides from genomic DNA of *L. plantarum* WCFS1. All primers are named after gene name. F or R denote forward or reverse primers, respectively. All forward primers have inserted an *Nde*I site (CATATG) and reverse primers a *Sal*I site (GTCGAC).

| Name  | Primer sequence (5'→3')                      |
|-------|----------------------------------------------|
| 0141F | CCATATGAAAAAATTAACATCAGTCGTTGCAAC            |
| 0141R | CGTCGACCGTGGCGGCATT                          |
| 0197F | CCATATGCGATTAATCGATTTCAAACCTTGGAT            |
| 0197R | GGTCGACGTCCGCCGCACT                          |
| 0277F | GCCATATGAAAAACACATTCAAAAACTAACCCTTAC         |
| 0277R | GGTCGACCGTGTGAGCAGAGGC                       |
| 0297F | CCATATGAAAGAAGTAAGGTTTTGGGGACT               |
| 0297R | GGTCGACTACGTCAGCCTTACTAAC                    |
| 0353F | CATATGAAGAATAAGTACAGTGCTAAGTTAGGT            |
| 0353R | GTCGACCGATTTTGCCTTGGCAAT                     |
| 0373F | CATATGTATACGGAAAACACGGGGAAAC                 |
| 0373R | GTCGACTGATGAAGCATCAACCAC                     |
| 0469F | CATATGCAGACGAAGAAGTGGATTC                    |
| 0469R | GTCGACACTAGTTGCGTGTACT                       |
| 0600F | CATATGATGAAACATAAAAATTTATTATTATAATTATAATGAGC |
| 0600R | GTCGACCTTATCCGCTTCAACTC                      |
| 0800F | CATATGAATA GATTTATAAC GAGCAAGCAG CATT        |
| 0800R | GTCGACCGTATCTGCCCGACTT                       |
| 0869F | CATATGACATCGATGGCTTATCGAACAC                 |
| 0869R | GTCGACCTTGGCGCCATTGAC                        |
| 0923F | CATATGAATAAGAAATTATTGTATACCAGTATTACCACT      |
| 0923R | GTCGACCGTGTGCGCCTGCGC                        |
| 0946F | CATATGAAACCAAACAATGTTAATAATCAGAATAAACGTC     |
| 0946R | GTCGACGTGCGCAGCCGCC                          |
| 1097F | CATATGAAAACGAAATTAATTGCACTGATTGGAGT          |
| 1097R | GTCGACGGTCGTCGCTTTGGC                        |
| 1124F | CATATGAAAAGGAATTCACAACAATCAACCAC             |
| 1124R | GTCGACCGTTGCTGCTAAGGC                        |
| 1229F | CATATGTTAA AAAAGGATAA TTTTGGAGAG CATAAAACAC  |
| 1229R | GTCGACATCTGCTGCGGCGGC                        |
| 1256F | CATATGAGATTGAAAATAAGGGGACGCTGGCTGTT          |
| 1256R | GTCGACCGTCGCCGCATGCAC                        |
| 2977F | CATATGAAGAAAATGATGCGGTGGTT                   |
| 2977R | GTCGACATTGGTTGCCTGTGCT                       |
| 3001F | CATATGATAAAGCCGCGTGTTTTAACGAC                |
| 3001R | GTCGACTACTGCAGCGACGGC                        |
| 3014F | CATATGAAAAAACTTGTAAGTACAATCGTAACTACCT        |
| 3014R | GTCGACTGAGTCGGCGTTAGCATT                     |
| 3015F | CATATGAAAAAATTATTAACCACAATCTTAACAACATCC      |
| 3015R | GTCGACTGCGTCGGCGTGTGC                        |
| 3043F | CATATGCGCTTTCCAAAAGAATCTTTTCAACAC            |
| 3043R | GTCGACTGTTGATGCGTTGGCACT                     |
| 3050F | CATATGAAAAAATTTAACTTTAAAACCATGTTGCTATTAGT    |
| 3050R | GTCGACCTTGGAGGCCTGGGC                        |
| 3059F | CATATGCGAT ATACACGGGG CAAAT                  |
| 3059R | GTCGACTTCACTTGCTTGAGCCAC                     |
| 3064F | CATATGCGTAACAGACGAGTAAAATGGTTAC              |
| 3064R | GTCGACAGTCGCGGCGTTAC                         |

3065F CCCATATGCCGAATAAATGGTGGCGATT  
3066R GTCGACTGTTGCCGCCCGCACT  
3067F GCCATATGAAGTCAATGTTAGGACACTTATT  
3067R GTCGACTTCTGCAGCATTGGCAAC  
3072F CGCATATGATGTTAACAAAGAGATGGT  
3072R GTCGACTGTGTTAGCCGAACCCGTT  
3073F GCCATATGAAAAAACATTATTAGGACTTTTATTCTC  
3073R GTCGACATCGGCCGCACTC  
3077F GCCATATGAAGAAATTGATGATTGCTGTAAC  
3077R GTCGACAGTCGCCGCATTGCT  
3093F GCCATATGAATTTTAAATCACAAAATCCAATTGATGC  
3093R GTGCACGCTGATGCTGTCGAC  
3114F CATATGCAAAGACGACGCTTACAACGAGC  
3114R GTCGACCGTGTCTGCCCGCC  
3115F GCCATATGCAGAAACGATTGCGATTATC  
3115R GTCGACCTGATCAGCAGAGGCT  
3116F GCCATATGAAGAAATTCGTTTTGGGATTAATGAT  
3116R GTCGACCGTATCAGCATTAGCC  
3117F GCCATATGCGGCGAATATGTAAAGTATTAATGGTAATT  
3117R GTCGACCGGCGCGGCCAGC  
3127F GCCATATGAACAAGCGAAAAATTACTAATAACC  
3127R GTCGACAGTGGCCGCAAAGGC  
3189F GCCATATGAGATTTGCGGGAAAGTTAAAGAAAGTT  
3189R GTCGACACTGGCTGCTTGGGC  
3411F GCCATATGACGAAACGAATGAGTTTCAAATTTAAAT  
3411R GTCGACACTGTCAGCGTGCGC  
3412F GCCATATGATGGTATTGTTACAAGTCATAGC  
3412R GTCGACCGTAGCTGCTTGAGC  
1303aF CATATGTTTAAAGTCGGCCGACTTGGGTATTT  
1303aR GTCGACAGTATCCGCCGAAACC  
1447F GCCATATGGCTAAATTCAGGCGTCTAGT  
1447R GTCGACGGTAGCCGCTAGGGC  
1448F GCCATATGAAAAAATTGATGTGCTTATTCGGCGTAATT  
1448R GTCGACAGCGGTGGCCTGGAC  
1449F GCCATATGTTTAAACCGCTTTTGTCTTAGCACG  
1449R GTCGACCGTTGCCCGATAGC  
1524F GCCATATGCAAACACTTAAGCCCTTCGAAAGT  
1524R GTCGACAAACCAGGCAAACGCAC  
1643F GCCATATGCGGAATCGTTTTAAATAGGTTGGGAT  
1643R GTCGACCGTTGCGGCTTTCACTT  
2145F GCCATATGAAAAAATTAATAAGTTGATGATCTTAGGCATGC  
2145R GTCGACGGCGCTAGCATGC  
2162F CATATGTCACAAGCACATAACAACGGGC  
2162R GTCGACTGAGGCAGCATTGGCAGCT  
2173F CATATGAGAAAGTTGATCAAGGCTTGTGGCCTAAT  
2173R GTCGACTTTGGCTGCTAAGGCACT  
2174F GCCATATGGGGTGTTTAGAATGCGAT  
2174R GTCGACAGATGCCGCTTGACC  
2175F GCCATATGCGAACTTTTAAATTAATGACCGGGTT  
2175R GTCGACTCCGGCCGCTAAC  
2486F CATATGACCGGTGATTCGGTTTATCGGGT  
2486R GTCGACAGTATCAGCAGAAGCATTAAACGTT  
2645F GCCATATGAAAATTGGAATGACAAAAAAGTAGTAAC  
2645R GTCGACTTGATTTGCACTTGCCGT

2795F CATATGGAACAAGTGAAGAAACGGTACAAGAT  
2795R GTCGACTTCATCTGCTCGTCC  
2796F GCCATATGAGATTAATCGTTAGGTCAGTT  
2796R GTCGACTTCATCCGCATGTGC  
2845F GCCATATGAAAATTAATAATGCCCTATTAECTTC  
2845R GTCGACGGTATCGGCATTAGC  
2847F GCCATATGAAAATTAACACCTATTATTATCCTCAT  
2847R GTCGACCGTATCGGCCTTAGC  
2925F GCCATATGTACAAAATTGGCCGTCGCT  
2925R GTCGACATCATCAGCCCGAGC  
2940F GCCATATGTCAAAGCGCTTAAGATAGT  
2940R GTCGACTTCGGCTGCATGTAC  
2976F GCCATATGATGCGATGGCTGTTGATAC  
2976R GTCGACCTGAGCAGCTCCC  
3413F GCCATATGAACGGCTGGAATAAGAAGC  
3413R GTCGACGTCAGCAGCATGGC  
3414F GCCATATGACAAAGTCACGTACGCTC  
3414R GTCGACGGTGTGAGCGGAAGC  
3421F GCCATATGAAGTACATACGTGACATTC  
3421R GTCGACTGAATCGGCATTGGC  
3450F GCCATATGTGGAAGGGACCGAAACAAAT  
3450R GTCGACGTCAGCAGCCTGAAT  
3451F GCCATATGAAAAAATATTTTGGCAGTTAATTGCC  
3451R GTCGACGTCATCCGCTCTAGC  
3452F CATATGAAAAGGGATTGTTGGTAACAGGT  
3452R GTCGACCGTTGCAGCTTGC  
3453F CATATGAAAAAATATCTCGGAACTCTCGT  
3453R GTCGACATCTGCAGCTTGGC  
3676F CATATGAGAAGGTTACTTACTGGCAC  
3676R GTCGACAACCTTTGCCTGCCCAT  
3678F GCCATATGAGATTGAAAGTGGTTATCCAATTC  
3678R GTCGACCCGATTAGCCGACAC  
3679F CATATGTTGGTAAGAGTTAGTAAGTTAGTCAGT  
3679R GTCGACCGTATCTGCCTGAGC  
2578F CATATGCGAA GAAAGCTAGT TGGGT  
2578R GTCGACTTCTTTAGCATGTGCAG  
1278F CATATGTTAAAGTTAATCAAACAACGGTTGGTATGGGGA  
1278S GTCGACACTGGTCGCGTGTGC  
3178F CATATGCAAAAAACGAAAGCTTGGT  
3178S GTCGACTGCTTGTGAGTTTTTACC  
2958F GGGGCATATGAAGTTAAGTAAGCGGGGACT  
2958R GTCGACAGTCGCGGCTTGGGC  
2588F CATATGCGCAAAAAATGGCGATGGT  
2588R GTCGACGTTGCGGGCCTGAC  
0304F CATATGAAGATTAAGAATGCTTTATTATCAACTGCTGCCG  
0304R GTCGACCGTAGCAGCTTGAGCGGT  
1450F CATATGAAAAAACAGTGCTTACCGC  
1450R GTCGACTGAATCGGCGGTTGC  
0302F CATATGAAGATCAAAAACCTTGTATTATCAT  
0302R GTCGACAGTATCAGCGTTGGC  
2978F CATATGAAAAAAGTAGTAGGCAGTTTACTCATGACC  
2978R GTCGACATCGGCCGCGTGAC  
GyrAF CCCGACAGCAACGTCTTCA  
GyrAR GGCAGCTGGCGTTTGT

NucAF GGTCAACCAATGACATTCAGACT  
NucAR ACTTGCTTCAGGACCATATTTCTC

---
